# Supplementary material for: Lysosomal TMEM106B interacts with galactosylceramidase to regulate myelin lipid metabolism
Source: PubMed Central journal article supplement — Commun Biol. 2024 Sep 5;7:1088. doi: 10.1038/s42003-024-06810-5 (PMC11377756; doi:10.1038/s42003-024-06810-5), 2024-09-05
Supplement: 42003_2024_6810_MOESM1_ESM.pdf [file 42003_2024_6810_MOESM1_ESM.pdf]

## **Supplementary Information**

### **Lysosomal TMEM106B interacts with galactosylceramidase to regulate myelin lipid metabolism**

Hideyuki Takahashi<sup>1</sup>, Azucena Perez-Canamas<sup>1</sup>, Chris W. Lee<sup>2</sup>, Hongping Ye<sup>3</sup>, Xianlin Han<sup>3,4</sup>, and Stephen M. Strittmatter<sup>1,\*</sup>

#### **Supplementary Figures 1-5**

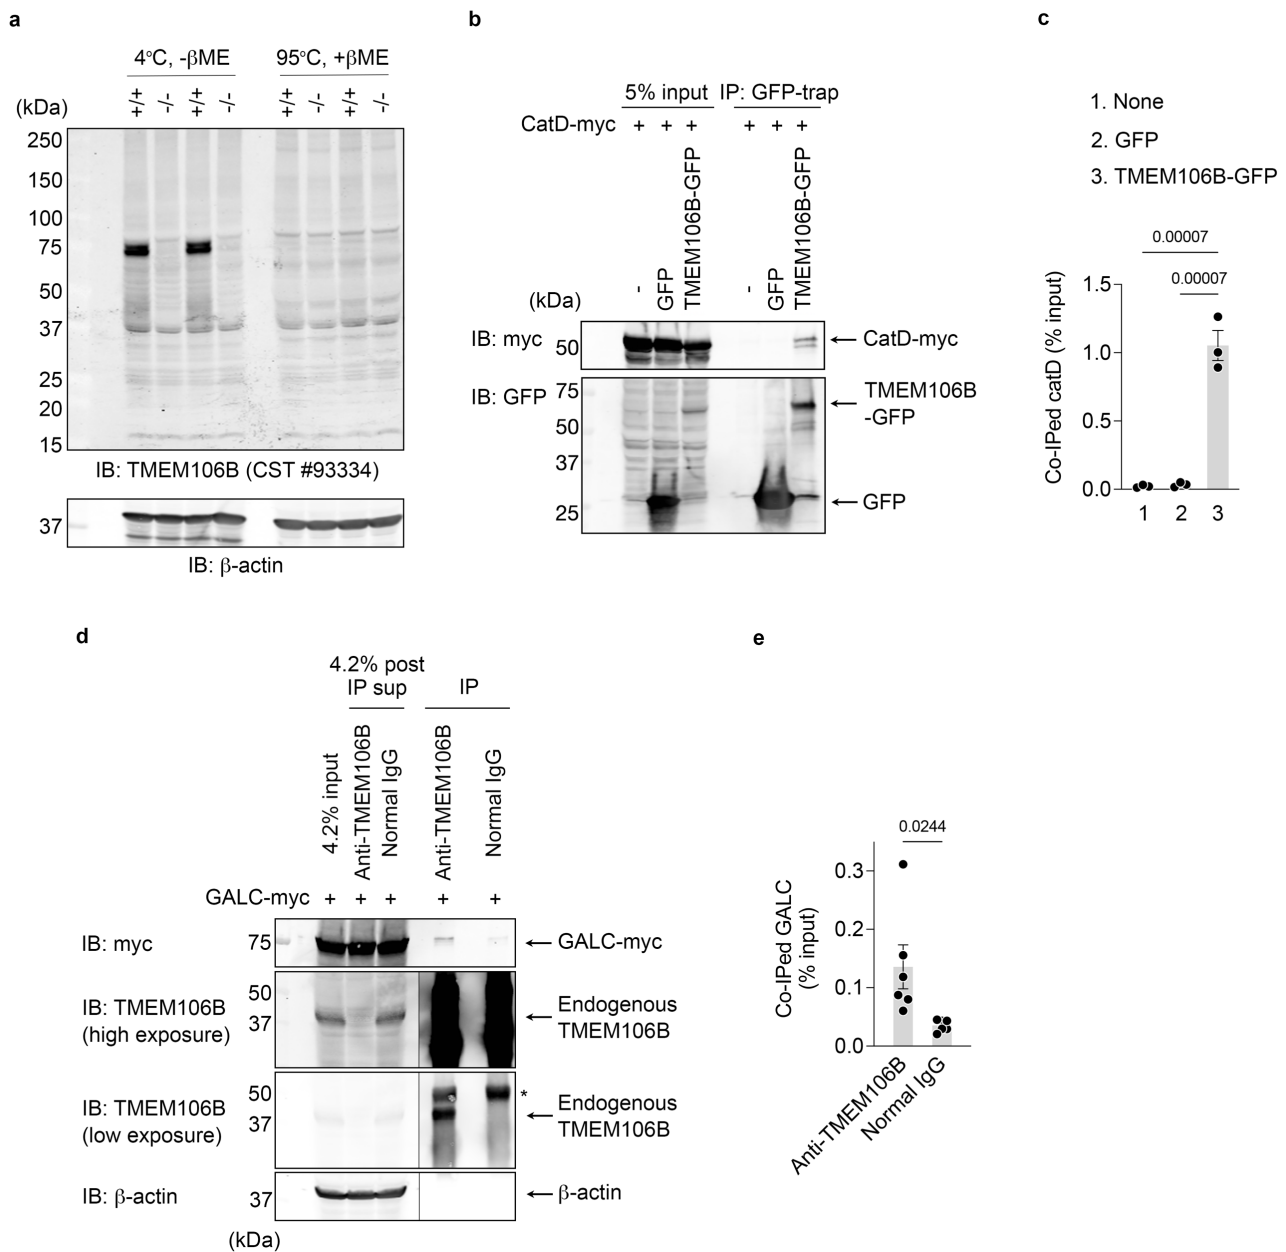

### Supplementary Fig. 1: TMEM106B interacts with cathepsin D or GALC

- Representative blots showing TMEM106B expression in WT and TMEM106B-deficient brains. The samples were prepared with or without heat and 2-mercaptoethanol treatment.
- Representative blots of co-IP assays using HEK293T cells expressing GFP or TMEM106B-GFP, together with myc-DDK-tagged cathepsin D (catD). Note that all samples were treated with 2-mercaptoethanol and heat (95°C) before running a gel.
- Quantification of co-IP in (a). Mean ± SEM, n = 3 experiments. P-values obtained from one-way ANOVA with Tukey's multiple comparisons test are shown in the graph.
- Representative blots of co-IP assays using HEK293T cells expressing myc-DDK-tagged human GALC. Anti-TMEM106B antibody (Cell Signaling #93334) was used to immunoprecipitate endogenous TMEM106B in HEK293T cells. Note that all samples were treated with 2-mercaptoethanol and heat (95°C) before running a gel. The asterisk indicates heavy chains of IgG.

e) Quantification of co-IP in (c). Mean  $\pm$  SEM, n = 6 experiments, p = 0.0244; two-tailed unpaired t-test.

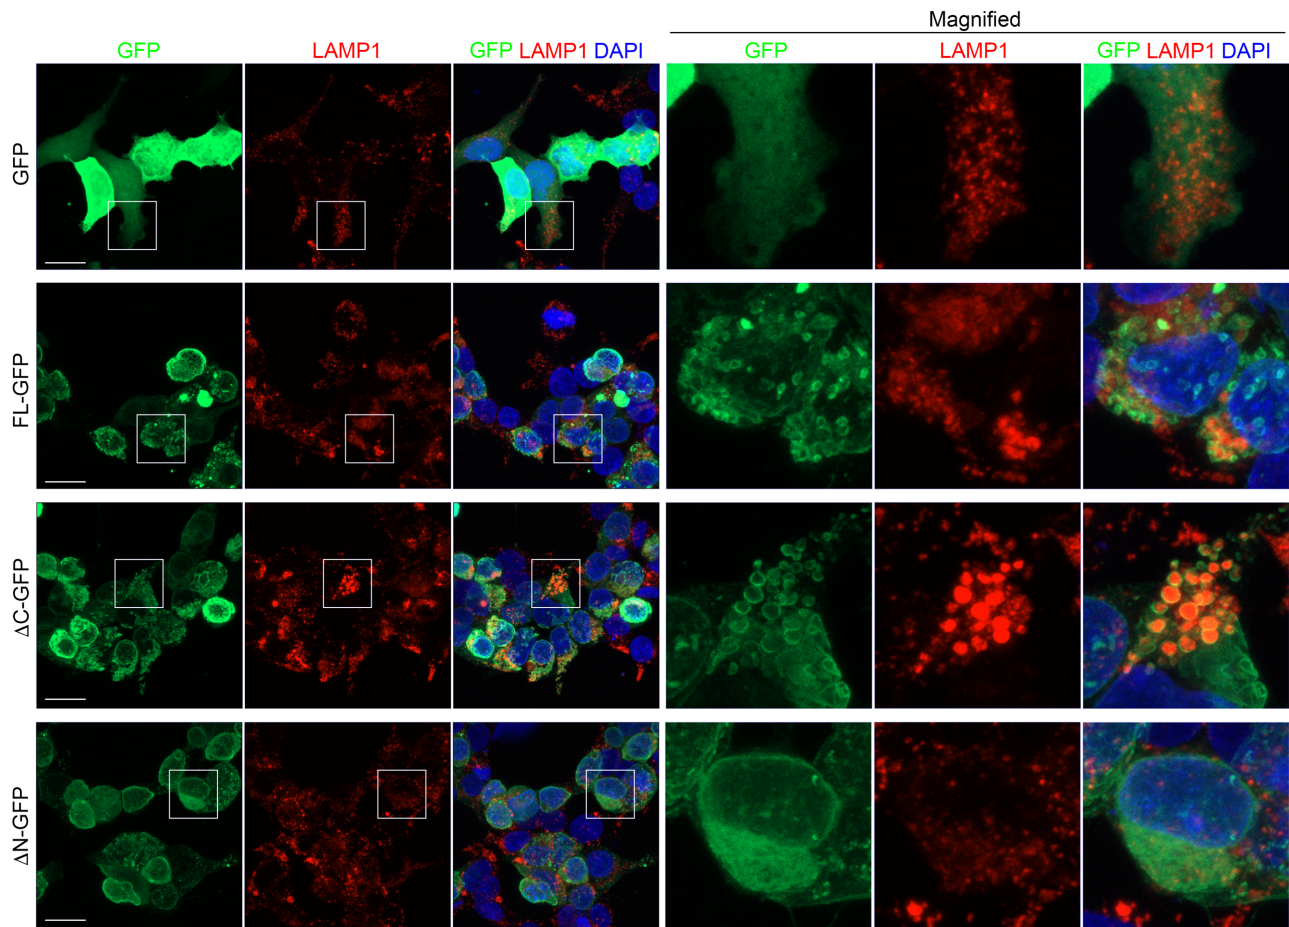

**Supplementary Fig. 2: Subcellular localization of GFP-tagged TMEM106Bs in HEK293T cells**

Representative immunostaining of HEK293T cells expressing GFP, FL TMEM106B-GFP,  $\Delta$ C-TMEM106B-GFP, or  $\Delta$ N-TMEM106B-GFP using anti-GFP and anti-LAMP1 antibodies. Bar, 20  $\mu$ m. Note that, consistent with many previous studies, overexpression of TMEM106B increased/alterd the size and number of LAMP1-positive lysosomes. In addition, the lysosomal changes were also observed in HEK293T cells expressing the other two deletion mutants. GFP alone was expressed throughout the cytoplasm. Overexpressed GFP-tagged FL and  $\Delta$ C-TMEM106B localized at the LAMP1-positive lysosomes to some extent but did not show complete colocalization likely due to overexpression of the proteins. GFP-tagged  $\Delta$ N-TMEM106B appeared to localize nonspecifically to any membrane-like structures but was also localized to organelles weakly positive for LAMP1, which are likely enlarged lysosomes caused by overexpression of the protein.

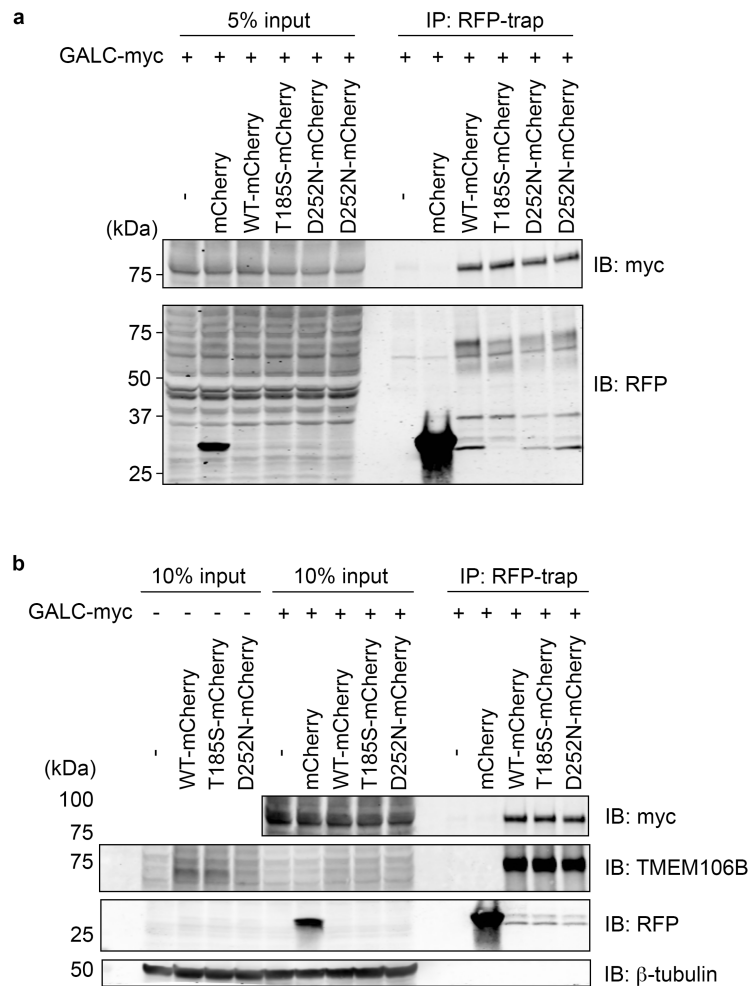

**Supplementary Fig. 3: T185S and D252N mutations have no significant effects on TMEM106B binding to GALC**

- a)** Representative blots of co-IP assays using HEK293T cells expressing mCherry, FL TMEM106B-mCherry, T185S TMEM106B-mCherry, or D252N TMEM106B-mCherry, together with myc-DDK-tagged mouse GALC. Note that all samples were treated with 2-mercaptoethanol and heat (95°C) before running a gel.
- b)** Immunoblots of a replication co-IP of **a)** using HEK293T cells expressing mCherry, FL TMEM106B-mCherry, T185S TMEM106B-mCherry, or D252N TMEM106B-mCherry, together with or without myc-tagged mouse GALC. In this replication experiment, input samples with single transfection of mCherry-tagged TMEM106Bs were also included as controls. In addition, anti-TMEM106B antibody was used to confirm expression of mCherry-tagged TMEM106Bs. Note that co-transfection of GALC decreased expression of mCherry-tagged TMEM106Bs, but still significant amounts of mCherry-tagged TMEM106Bs were immunoprecipitated by RFP-trap from the co-transfected HEK293T cells. Note that all samples were treated with 2-mercaptoethanol and heat (95°C) before running a gel.

**a**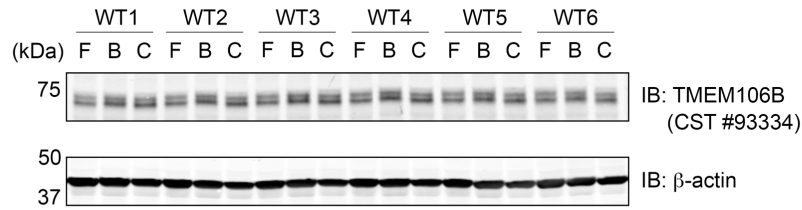**b**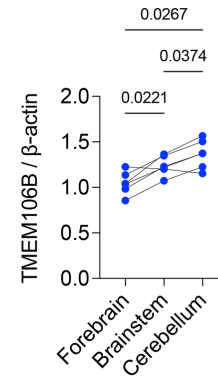

#### Supplementary Fig. 4: TMEM106B levels in the forebrain, brainstem, and cerebellum

- a)** Immunoblot analysis of the Triton X-100-soluble fraction from the forebrain, brainstem, and cerebellum of WT mice using anti-TMEM106B antibody (CST #93334). Note that immunoblot with anti-TMEM106B antibody and anti-β-actin antibody was performed using samples without and with 2-mercaptoethanol plus heat (95°C) treatment, respectively. F, forebrain; B, brainstem; C, cerebellum.
- b)** Quantification of immunoblot analysis in **a**).  $n = 6$  mice. Values shown in the graph are  $p$ -values from Tukey's multiple comparisons test after repeated measures one-way ANOVA with the Geisser-Greenhouse correction.

# Supplementary Fig. 5: Uncropped blots

Fig. 4b

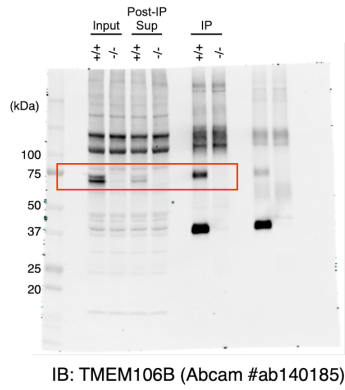

Fig. 4f

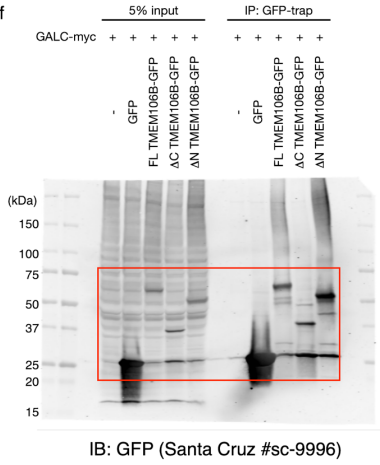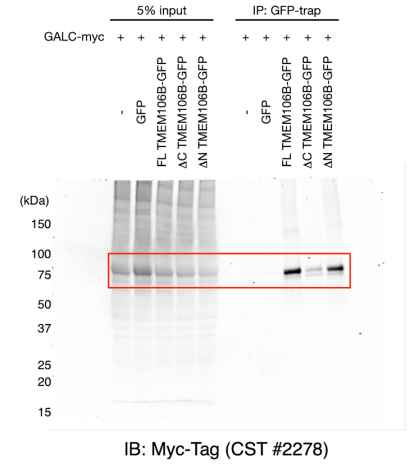

Fig. 5e

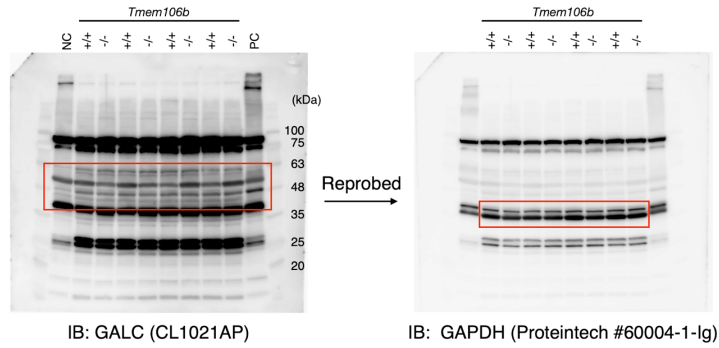

Supplementary Fig. 1a

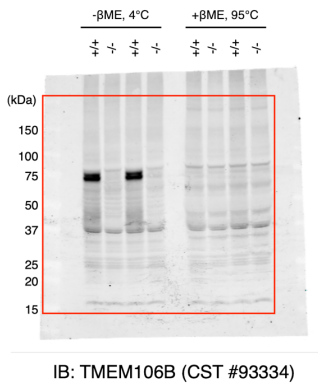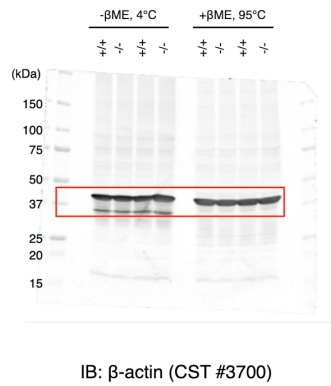

Supplementary Fig. 1b

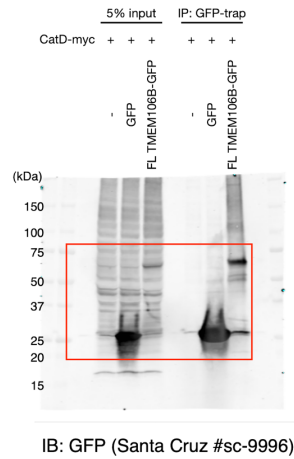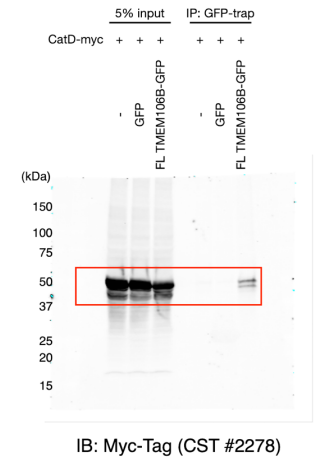

Supplementary Fig. 1d

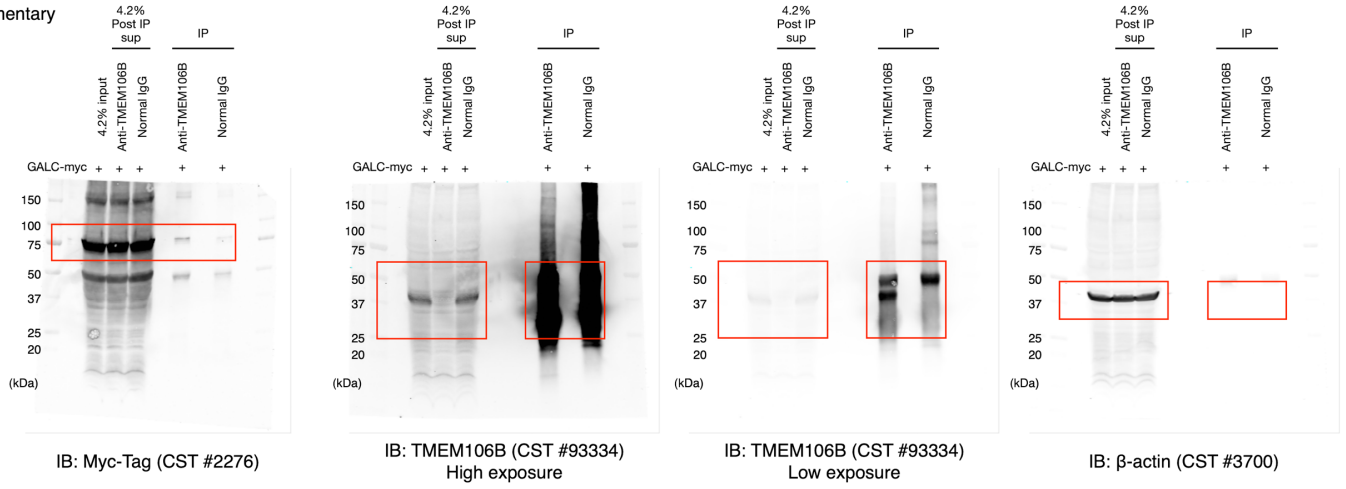

Supplementary Fig. 3a

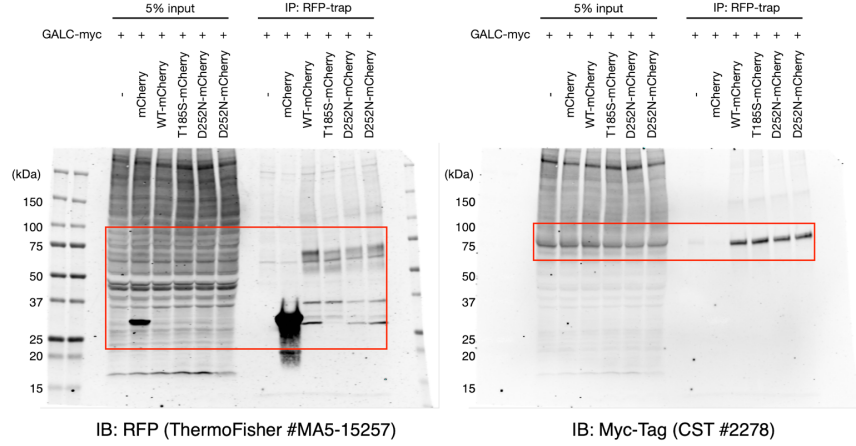

Supplementary Fig. 3b

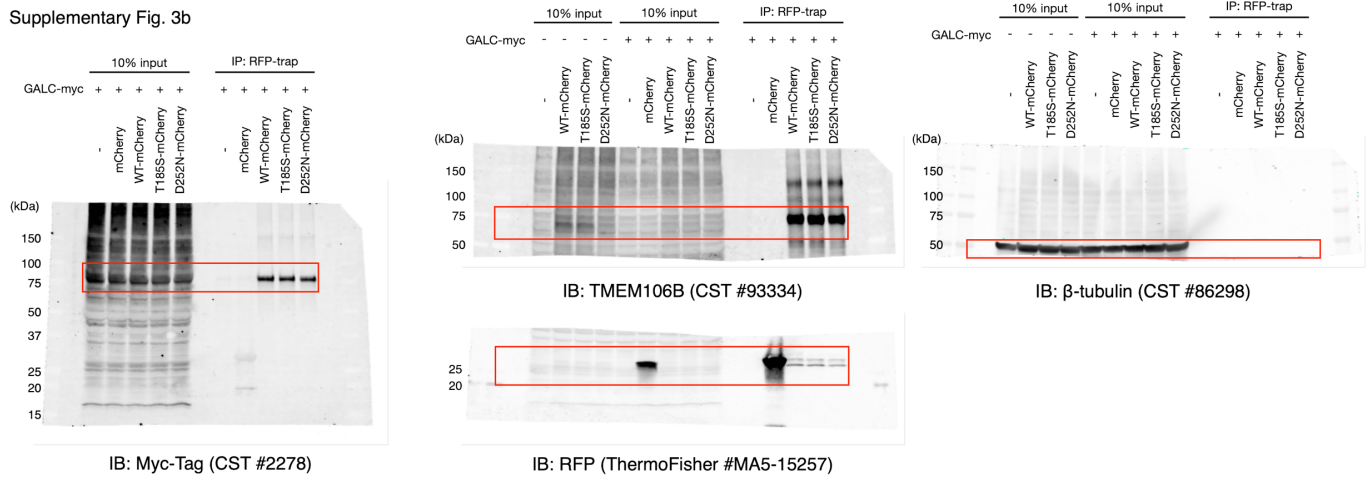



Supplementary Fig. 4a

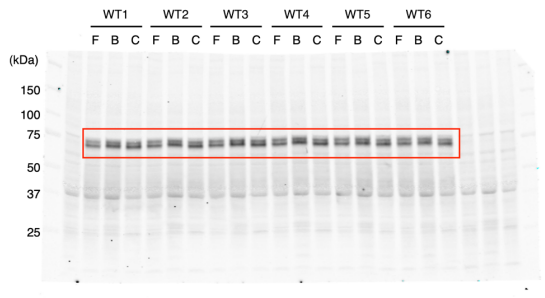

IB: TMEM106B (CST #93334)

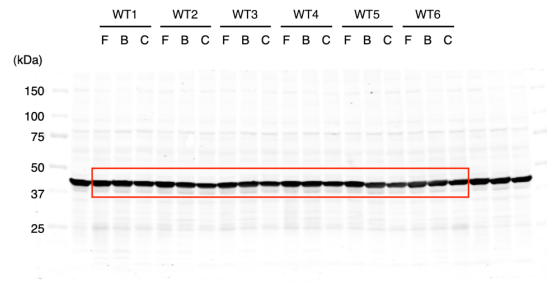

IB:  $\beta$ -actin (CST #3700)
