# Supplementary material for: Lysosomal TMEM106B interacts with galactosylceramidase to regulate myelin lipid metabolism
Source: PubMed Central journal article supplement — Commun Biol. 2024 Sep 5;7:1088. doi: 10.1038/s42003-024-06810-5 (PMC11377756; doi:10.1038/s42003-024-06810-5), 2024-09-05
Supplement: 42003_2024_6810_MOESM2_ESM.pdf [file 42003_2024_6810_MOESM2_ESM.pdf]

## Description Of Additional Supplementary File

**File name:** Supplementary Data 1

**Description:** Discovery analysis of lipidomics

**File name:** Supplementary Data 2

**Description:** Replication analysis of lipidomics

**File name:** Supplementary Data 3

**Description:** HexCer analysis

**File name:** Supplementary Data 4

**Description:** The source data behind the graphs in the paper
